# Supplementary material
Source: publisher figshare collection journal article supplement (https://gsajournals.figshare.com/articles/dataset/_/12643310)

**Figure S3. Analysis of read counts mapping to the chromosomes in the MA lines and parent strains.** Each dot indicates the total read count in 5 kb bins. Grey vertical lines show chromosomal boundaries. Horizontal blue and red lines show the median and 2x median read counts that map to the chromosomes, respectively.

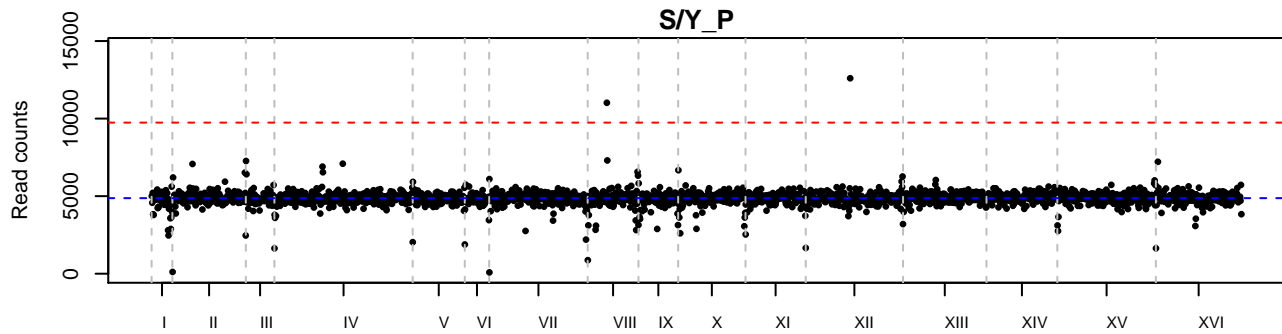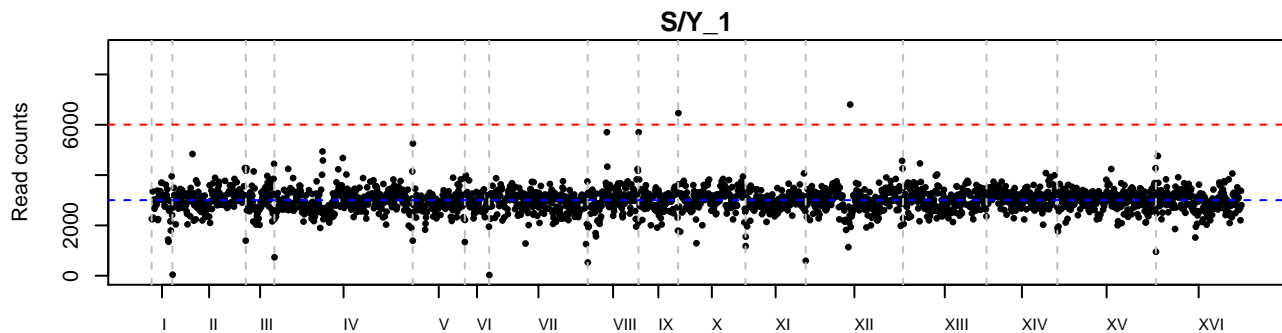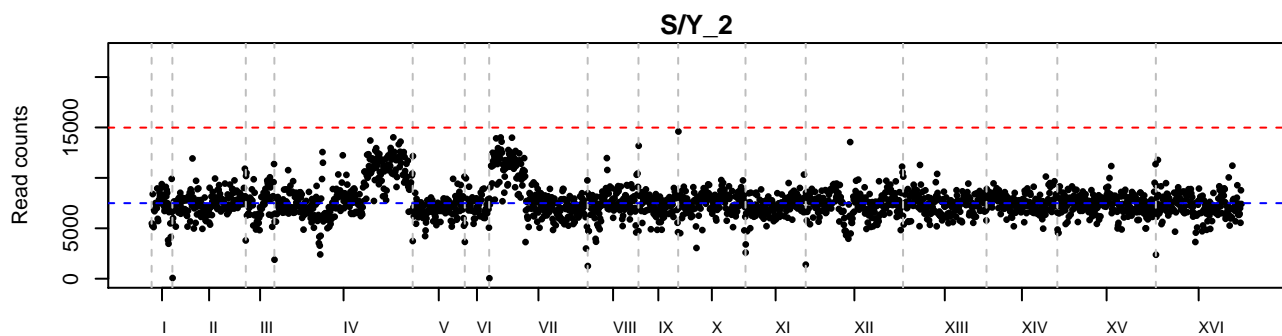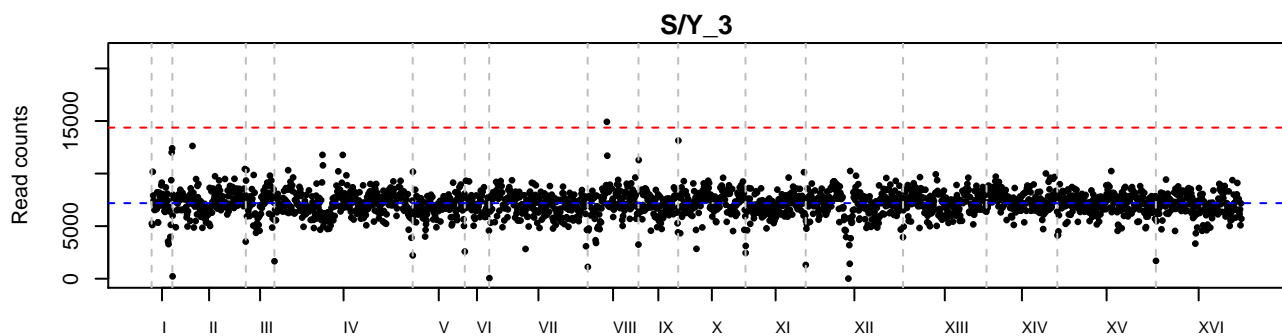

**S/Y\_4**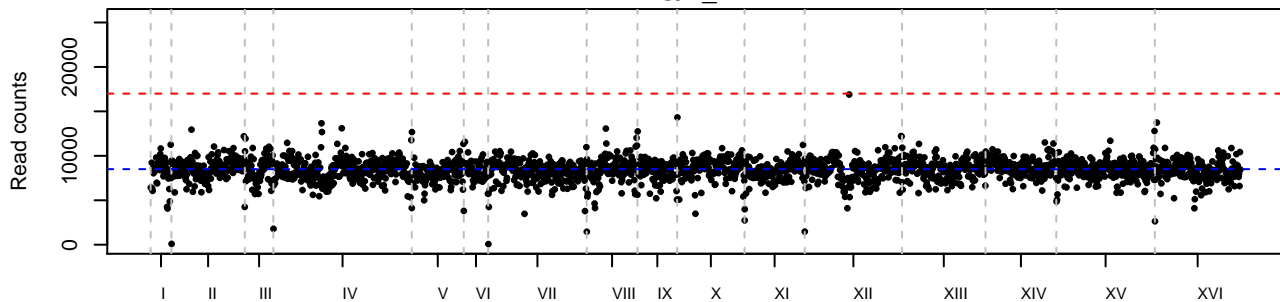**S/Y\_5**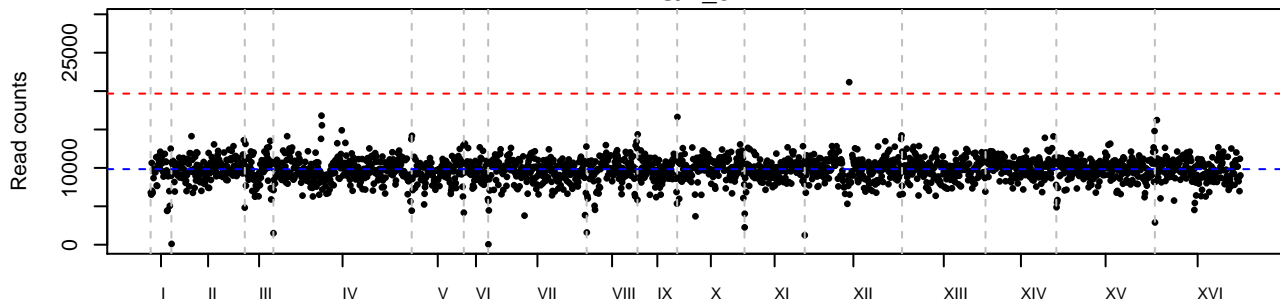**S/Y\_6**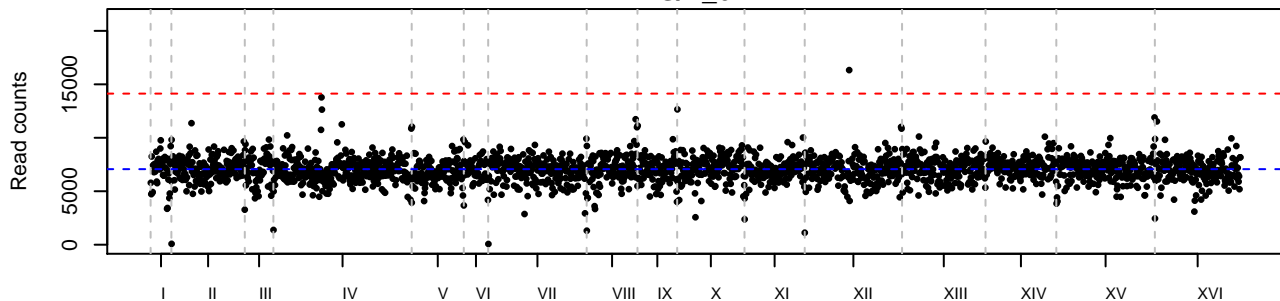**S/Y\_7**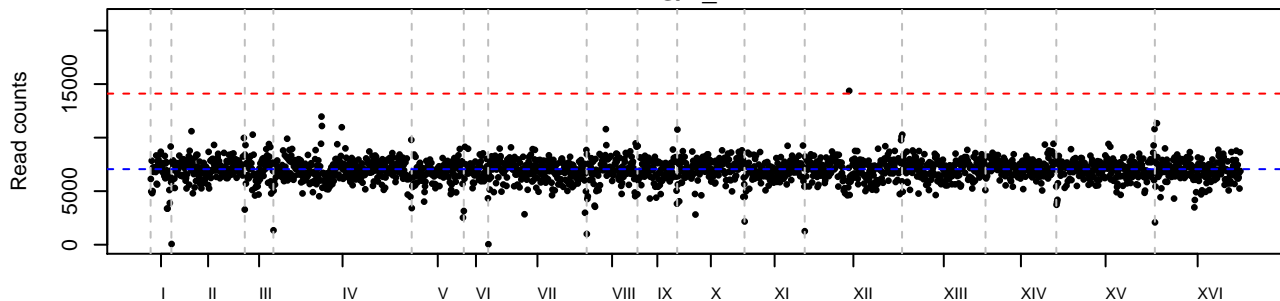

S/Y\_8

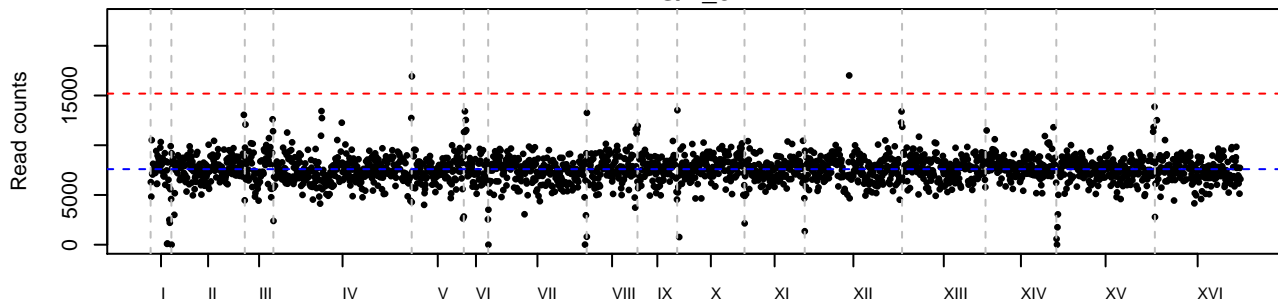

S/Y\_9

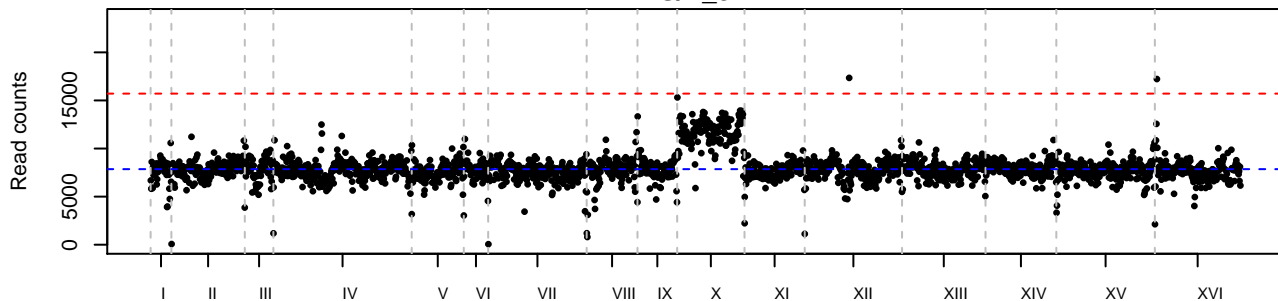

S/Y\_10

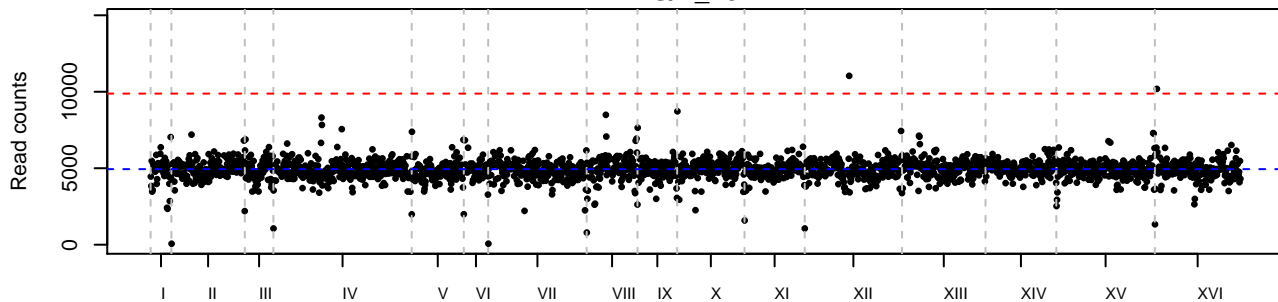

S/R\_P

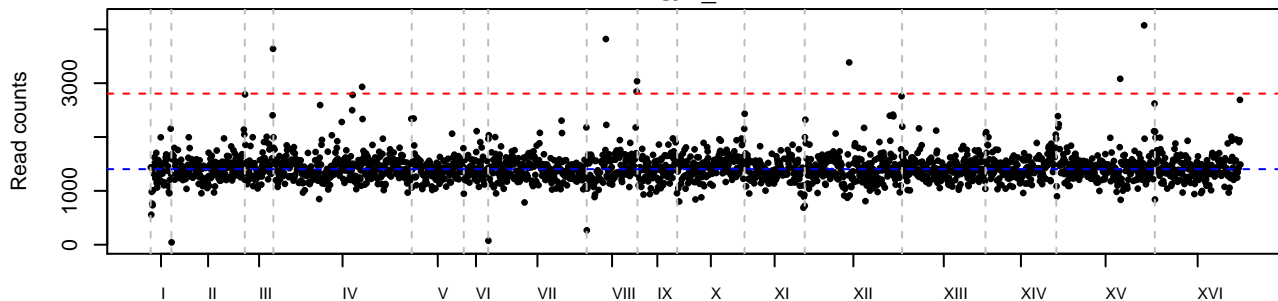

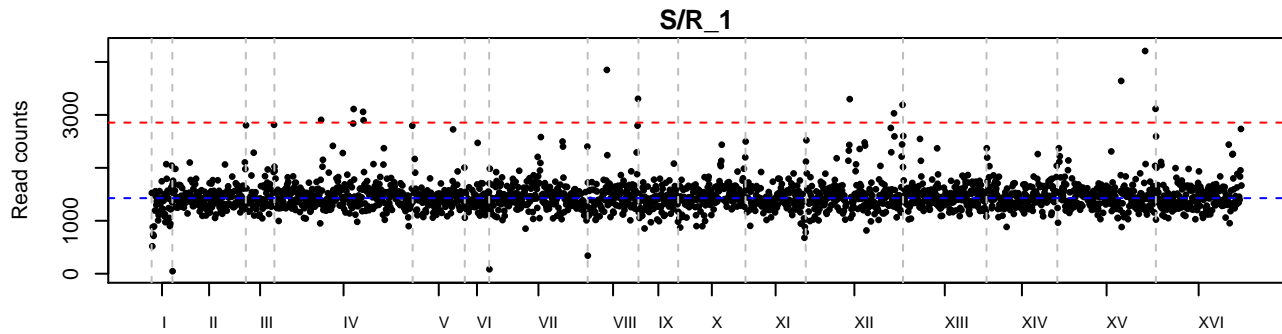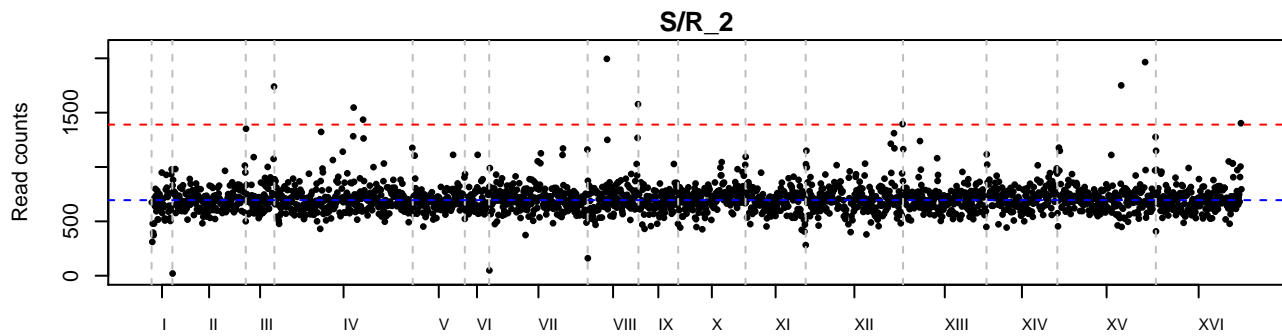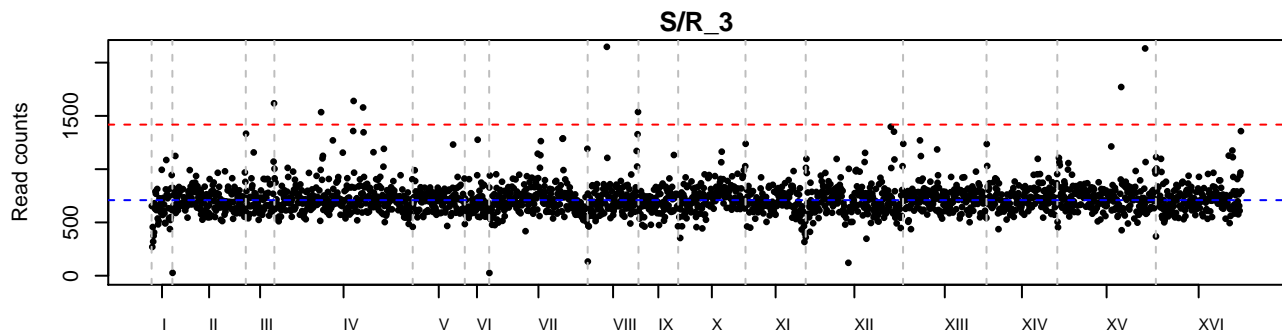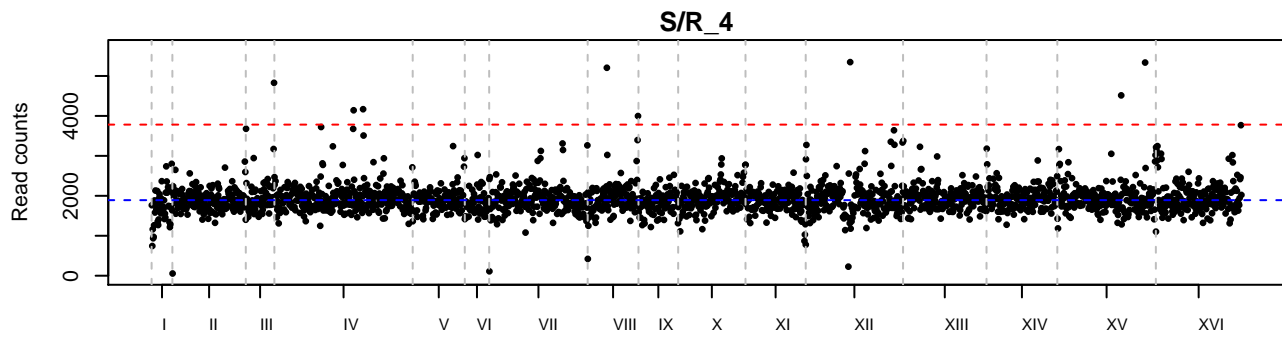

S/R\_5

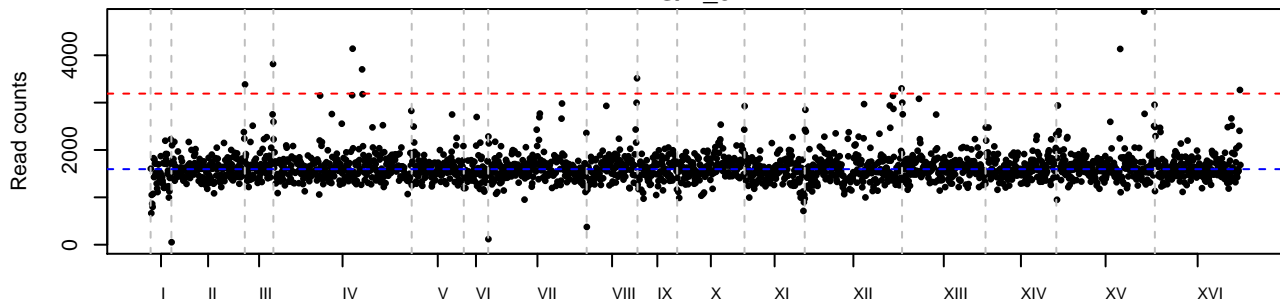

S/R\_6

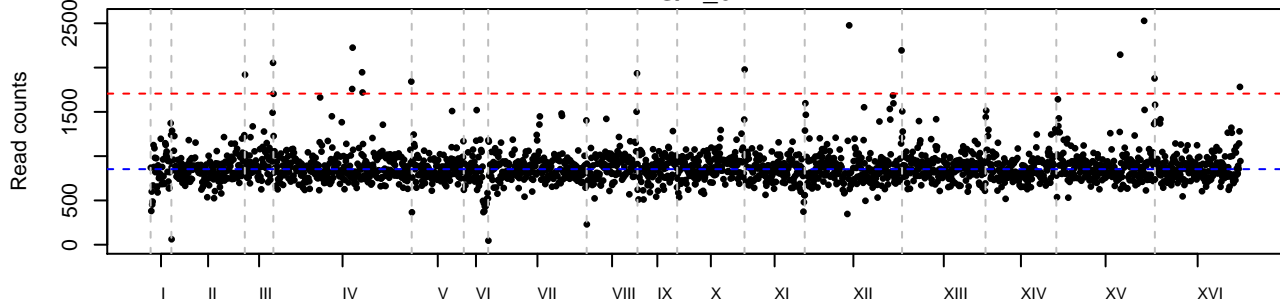

S/R\_7

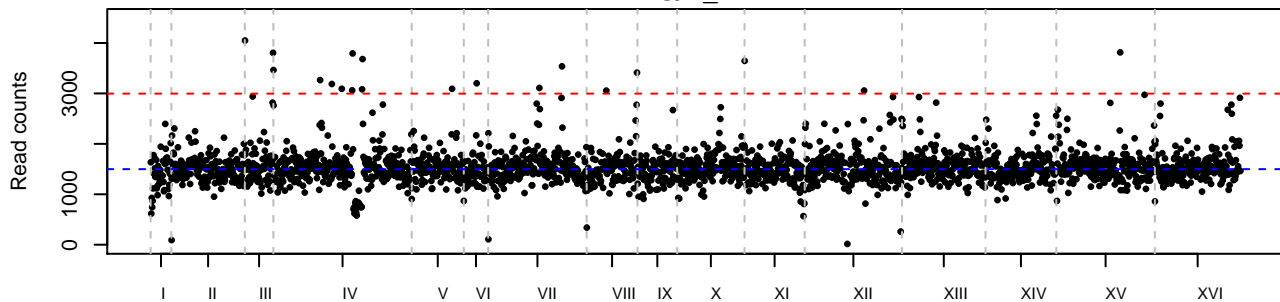

S/R\_8

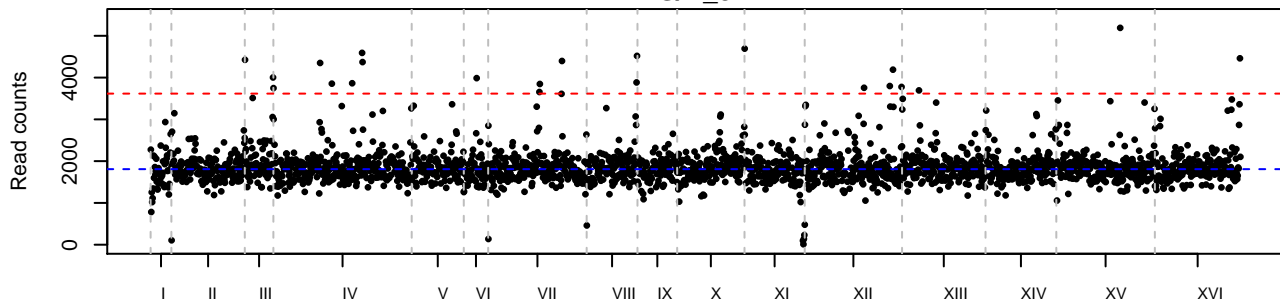

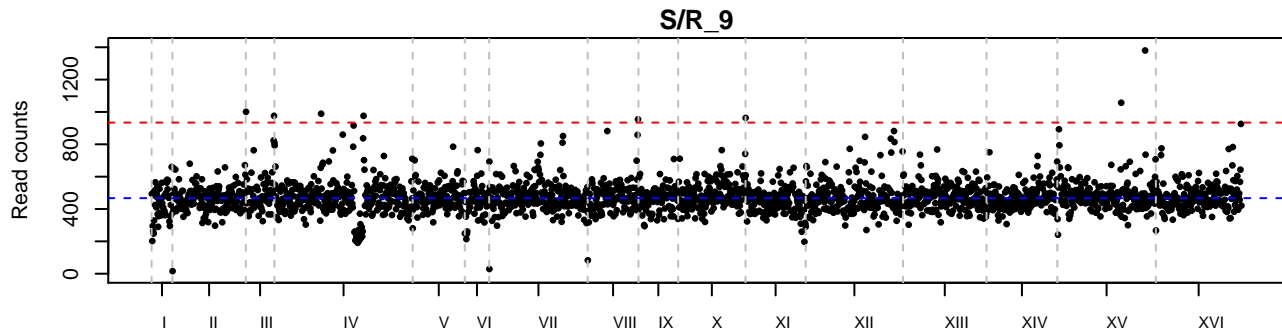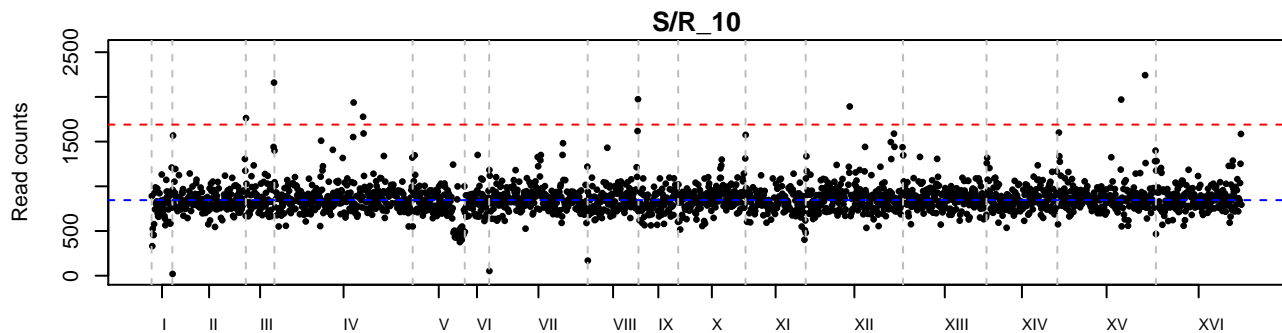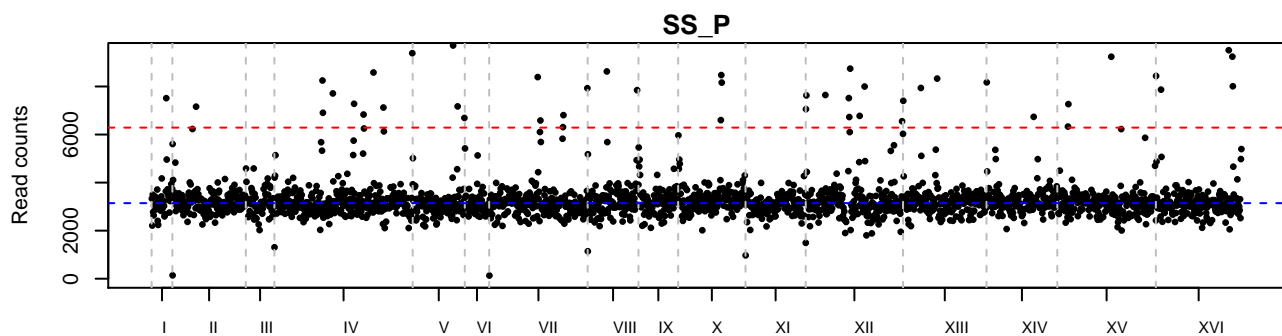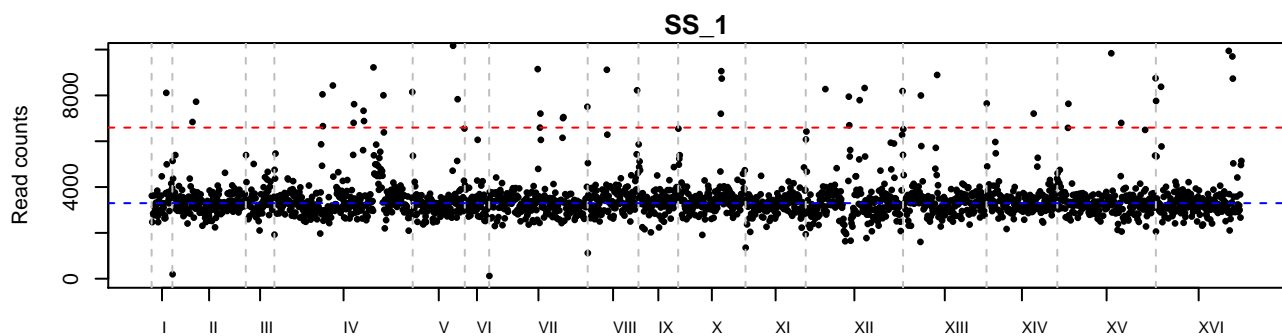

SS\_2

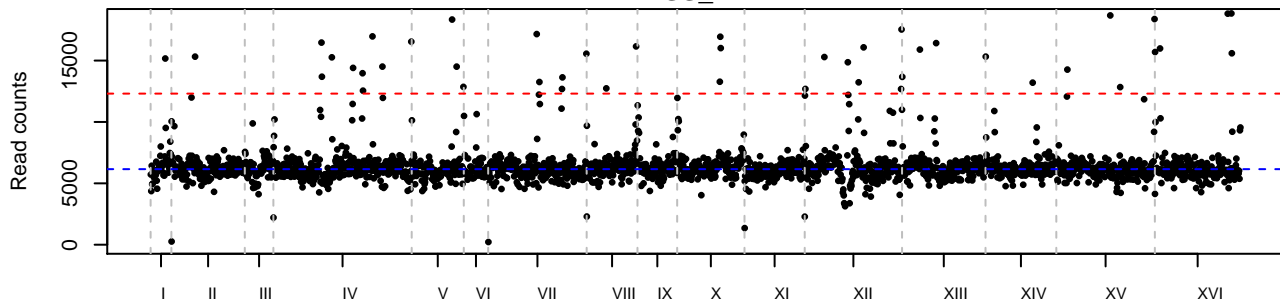

SS\_3

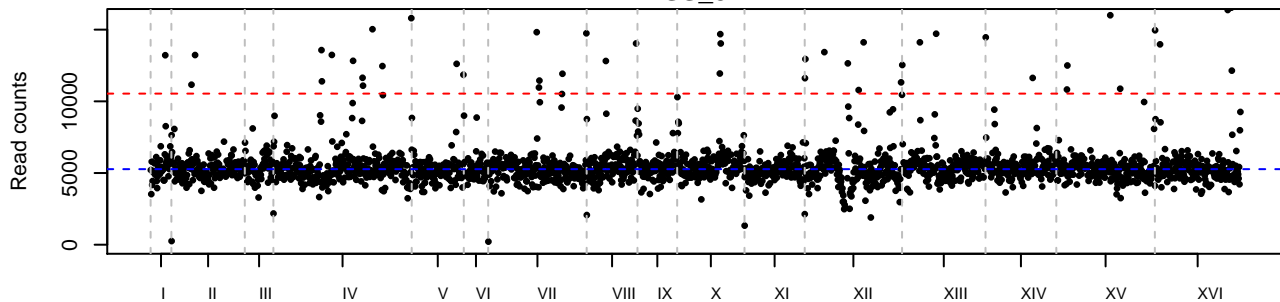

SS\_4

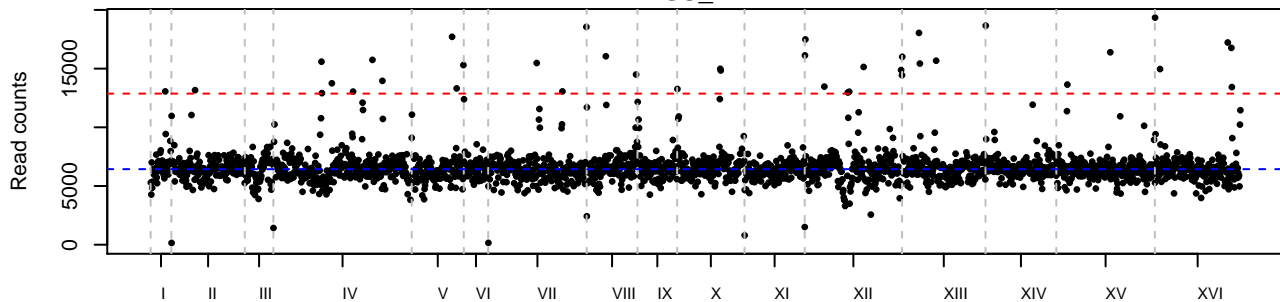

SS\_5

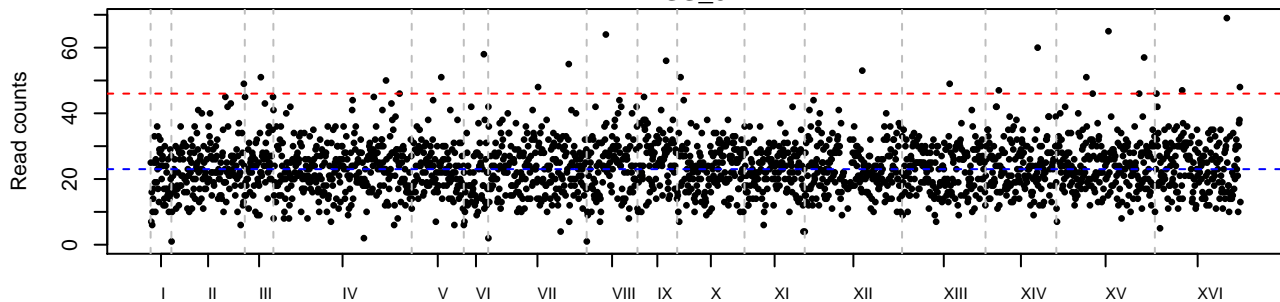



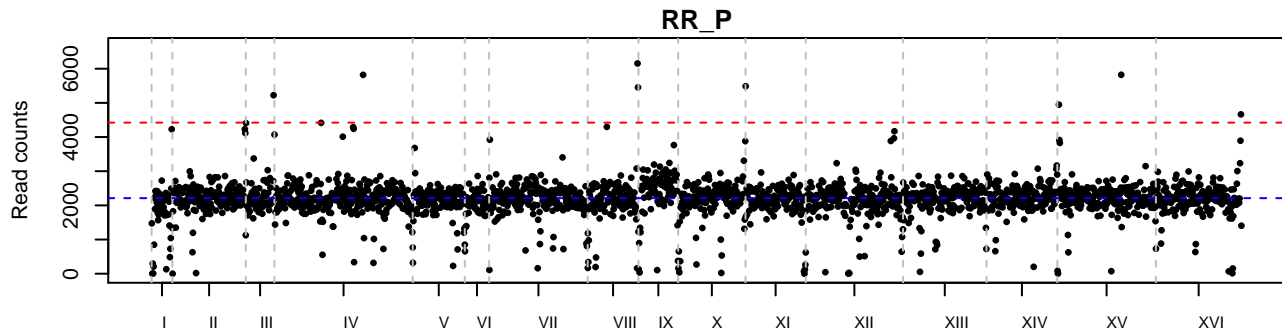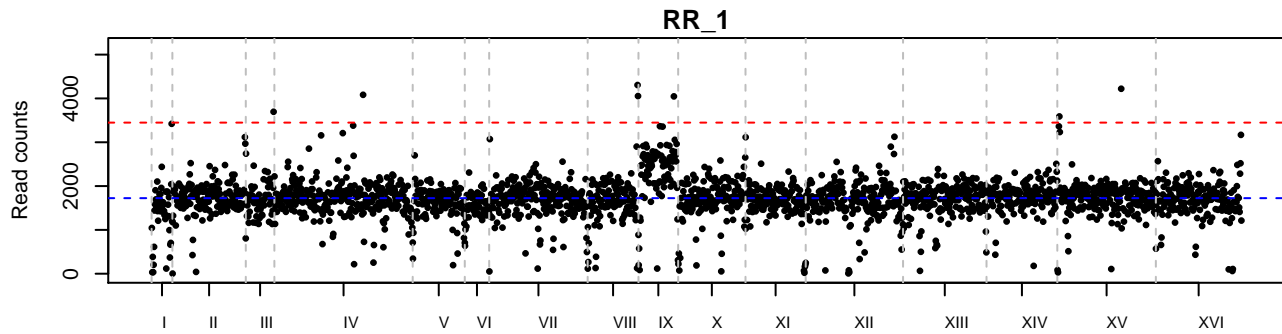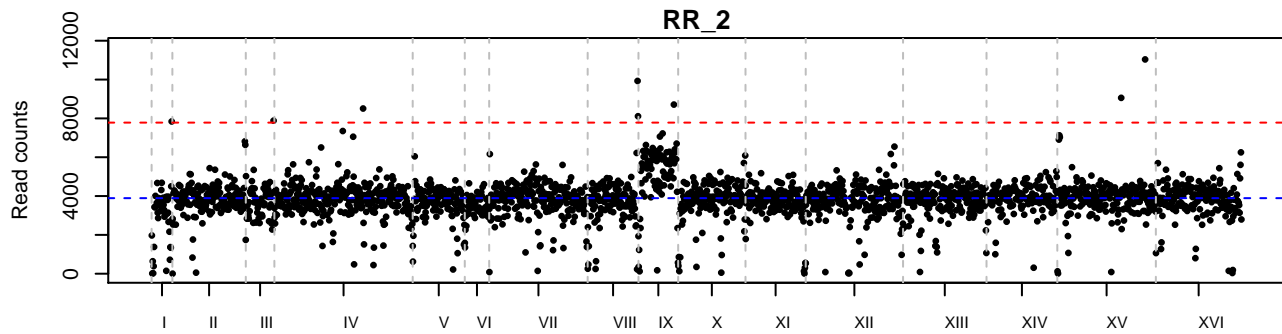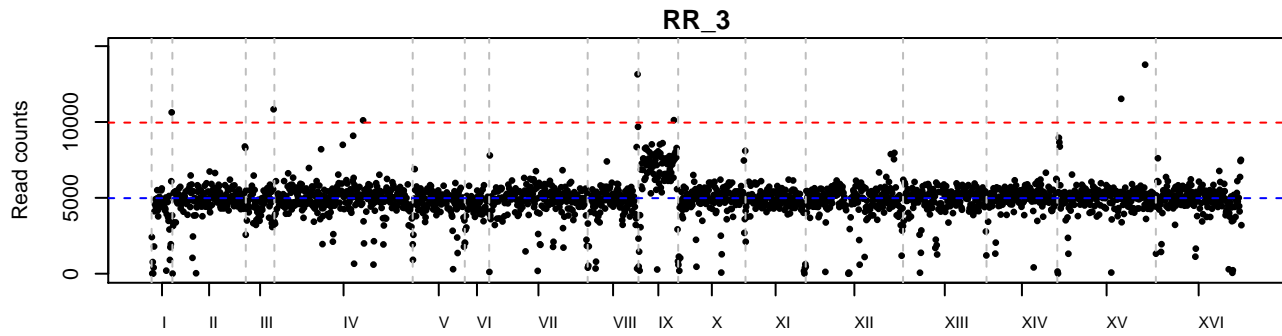

RR\_4

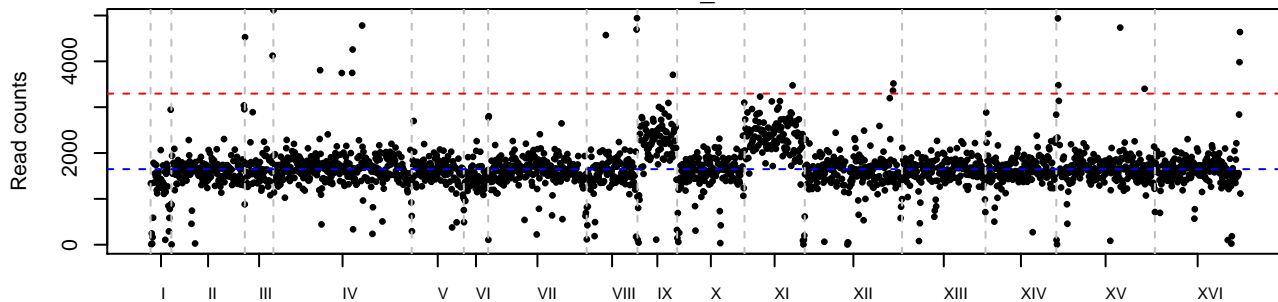

RR\_5

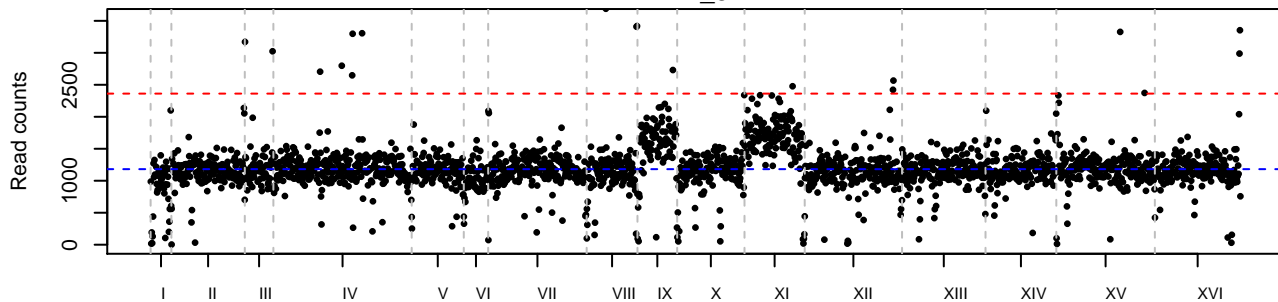

YY\_P

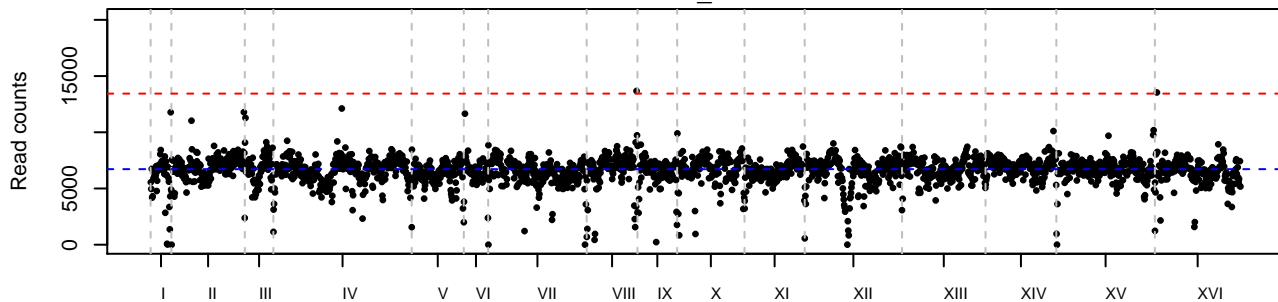

YY\_1

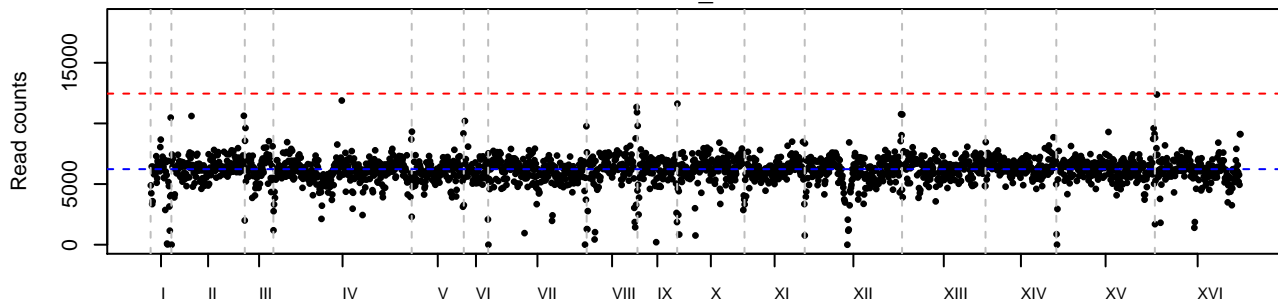

YY\_2

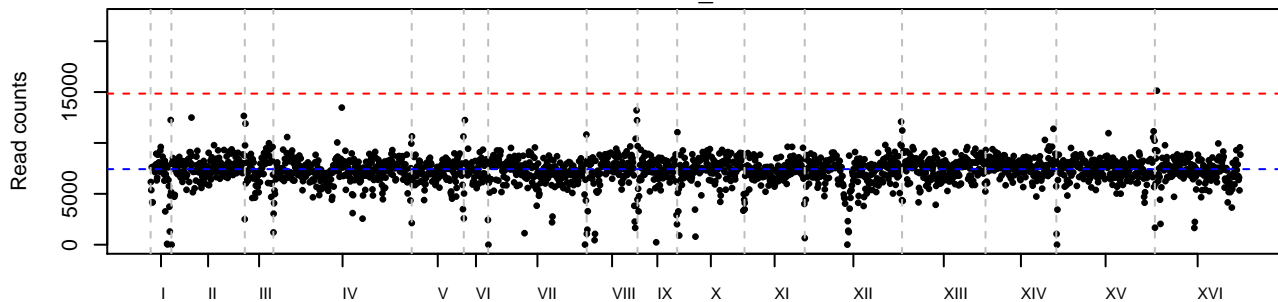

YY\_3

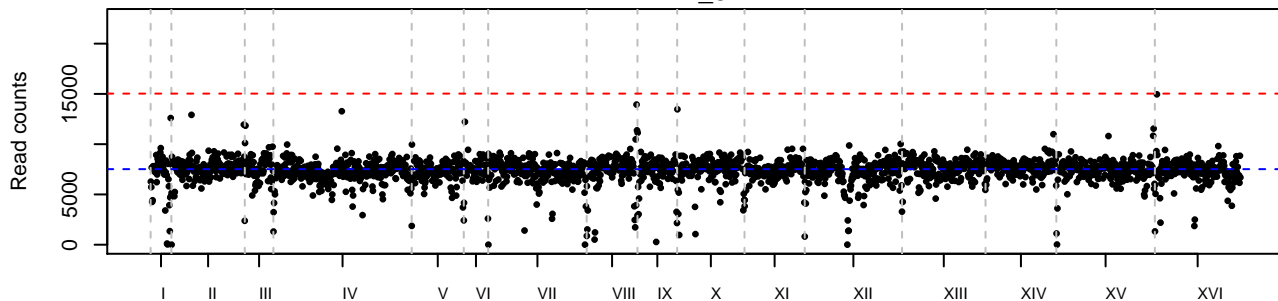

YY\_4

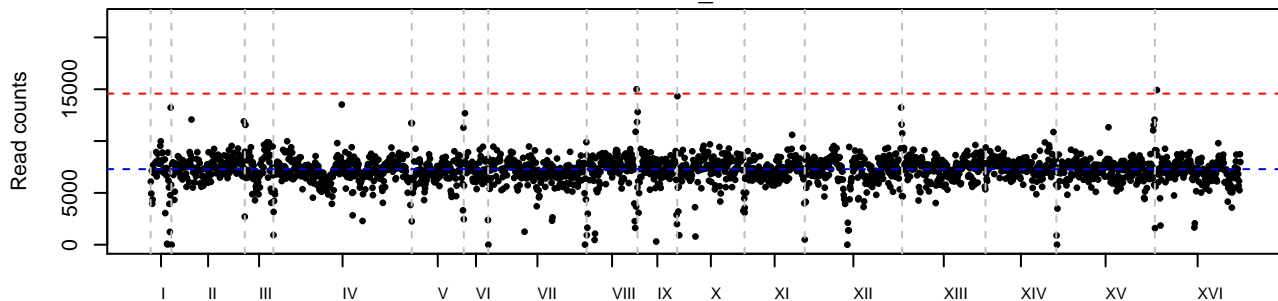

YY\_5

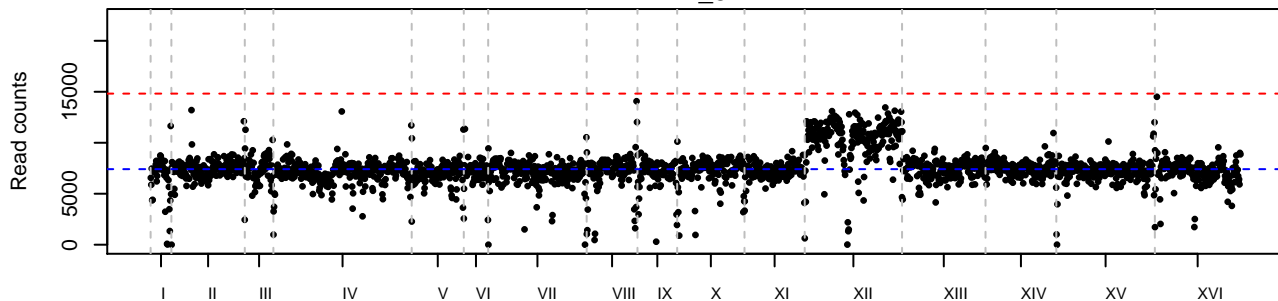

Supplement: Supplementary file 1 [file 1]
